# Supplementary material for: Soft Mesoporous Organosilica Nanoplatforms Improve Blood Circulation, Tumor Accumulation/Penetration, and Photodynamic Efficacy
Source: Nanomicro Lett. 2020 Jun 30;12:137. doi: 10.1007/s40820-020-00465-7 (PMC7770801; doi:10.1007/s40820-020-00465-7)
Supplement: Supplementary file 1 — Supplementary material 1 (PDF 1001 kb) [file 40820_2020_465_MOESM1_ESM.pdf]

Supporting Information for

## Soft Mesoporous Organosilica Nanoplatfoms Improve Blood Circulation, Tumor Accumulation/Penetration, and Photodynamic Efficacy

Xin Peng<sup>1, #</sup>, Kun Chen<sup>3, #</sup>, Wanhua Liu<sup>1, \*</sup>, Xiongfeng Cao<sup>4</sup>, Mengru Wang<sup>1</sup>, Jun Tao<sup>3</sup>, Ying Tian<sup>2</sup>, Lei Bao<sup>5</sup>, Guangming Lu<sup>2, \*</sup>, Zhaogang Teng<sup>2, 3, \*</sup>

<sup>1</sup>Jiangsu Key Laboratory of Molecular and Functional Imaging, Department of Radiology, Zhongda Hospital, School of Medicine, Southeast University, Nanjing, 210009 Jiangsu, People's Republic of China

<sup>2</sup>Department of Medical Imaging, Jinling Hospital, School of Medicine, Nanjing University, Nanjing 210002, People's Republic of China

<sup>3</sup>Key Laboratory for Organic Electronics and Information Displays, Jiangsu Key Laboratory for Biosensors, Institute of Advanced Materials, Jiangsu National Synergetic Innovation Centre for Advanced Materials, Nanjing University of Posts and Telecommunications, Nanjing 210023, People's Republic of China.

<sup>4</sup>Affiliated Hospital of Jiangsu University, Jiangsu University, Zhenjiang 212001, People's Republic of China

<sup>5</sup>Soft Matter & Interface Group, School of Engineering, RMIT University, Melbourne, VIC 3000, Australia

#Xin Peng and Kun Chen contributed equally to this work

\*Corresponding authors. E-mail: [liuwanhua.com@126.com](mailto:liuwanhua.com@126.com) (Wanhua Liu); [cjr.luguangming@vip.163.com](mailto:cjr.luguangming@vip.163.com) (Guangming Lu); [iamzgteng@njupt.edu.cn](mailto:iamzgteng@njupt.edu.cn) (Zhaogang Teng)

## Supplementary Table and Figures

**Table S1** Hydrodynamic diameter and zeta potential of the SMONs-HA-Cy5.5 and MONs-HA-Cy5.5 after storing in different solvent conditions for two weeks

|                | Ethanol   |       | Water     |       | PBS       |       | DMEM(10%FBS) |       |
|----------------|-----------|-------|-----------|-------|-----------|-------|--------------|-------|
|                | Diameter  | PDI   | Diameter  | PDI   | Diameter  | PDI   | Diameter     | PDI   |
| SMONs-HA-Cy5.5 | 235.7±2.4 | 0.153 | 285.3±1.2 | 0.106 | 249.2±2.1 | 0.203 | 248.2±3.5    | 0.187 |
| MONs-HA-Cy5.5  | 215.2±2.3 | 0.128 | 263.3±1.5 | 0.132 | 237.8±1.7 | 0.198 | 225.8±0.6    | 0.089 |

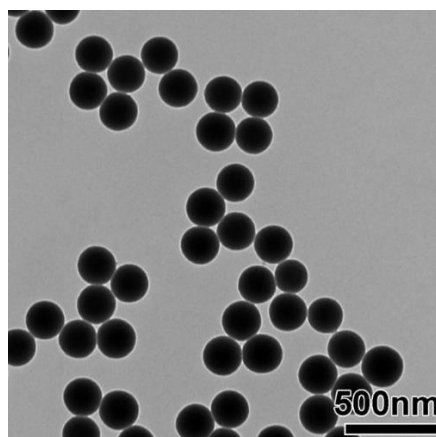

**Fig. S1** TEM of the mother MONs prepared by *via* a CTAB-directed sol–gel process

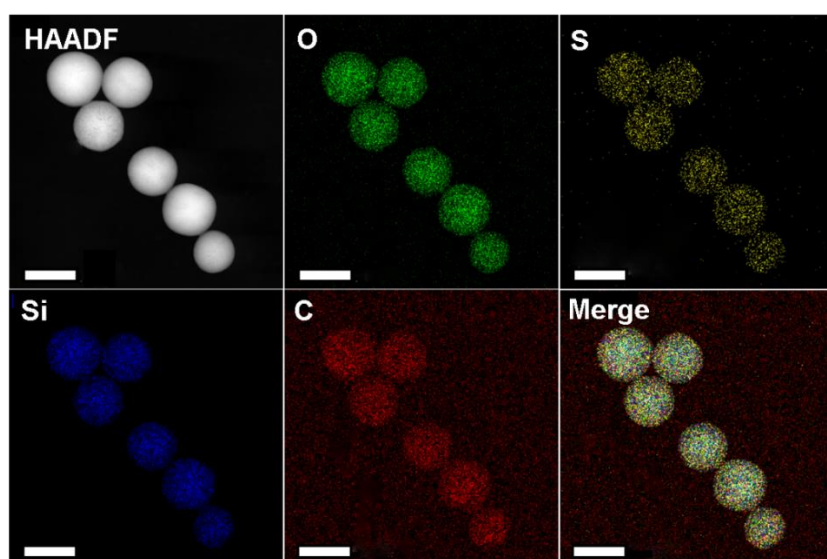

**Fig. S2** STEM-HAADF image and EDX elemental mapping images of the MONs-HA-Cy5.5. Scale bars, 100 nm

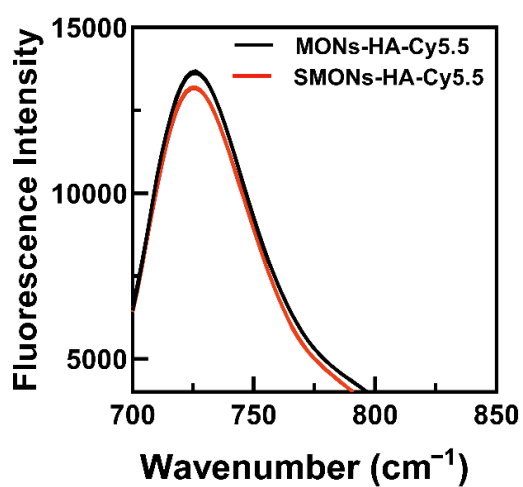

**Fig. S3** Uv-vis of the SMONs-HA-Cy5.5 and MONs-HA-Cy5.5

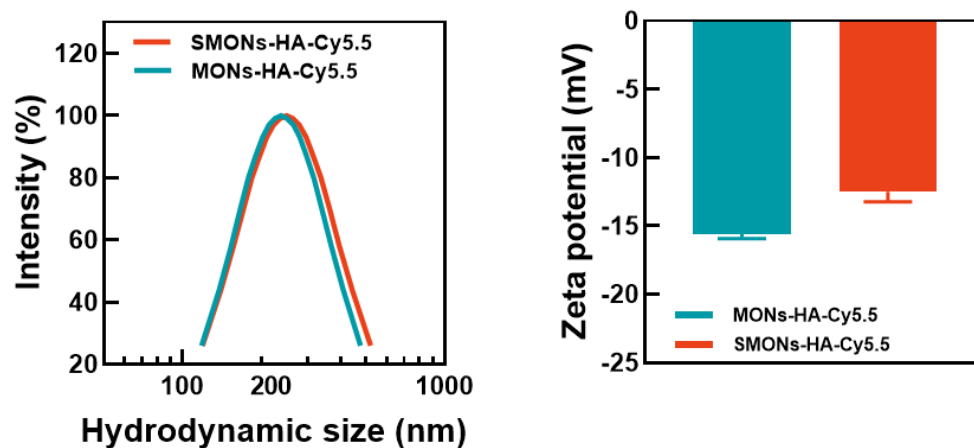

**Fig. S4** The hydrodynamic diameters and zeta potential of MONs-HA-Cy5.5 and SMONs-HA-Cy5.5 after been stored in PBS for two weeks

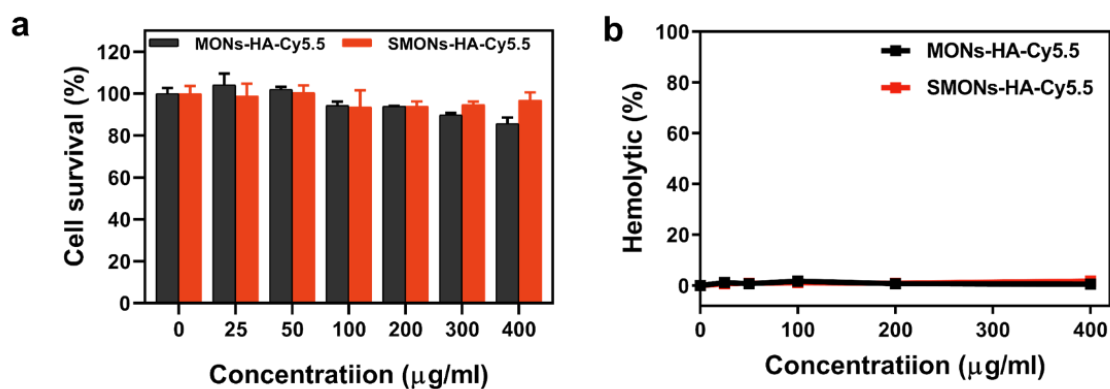

**Fig. S5** (a) Cytotoxicity and (b) hemocompatibility of the MONs-HA-Cy5.5 and SMONs-HA-Cy5.5

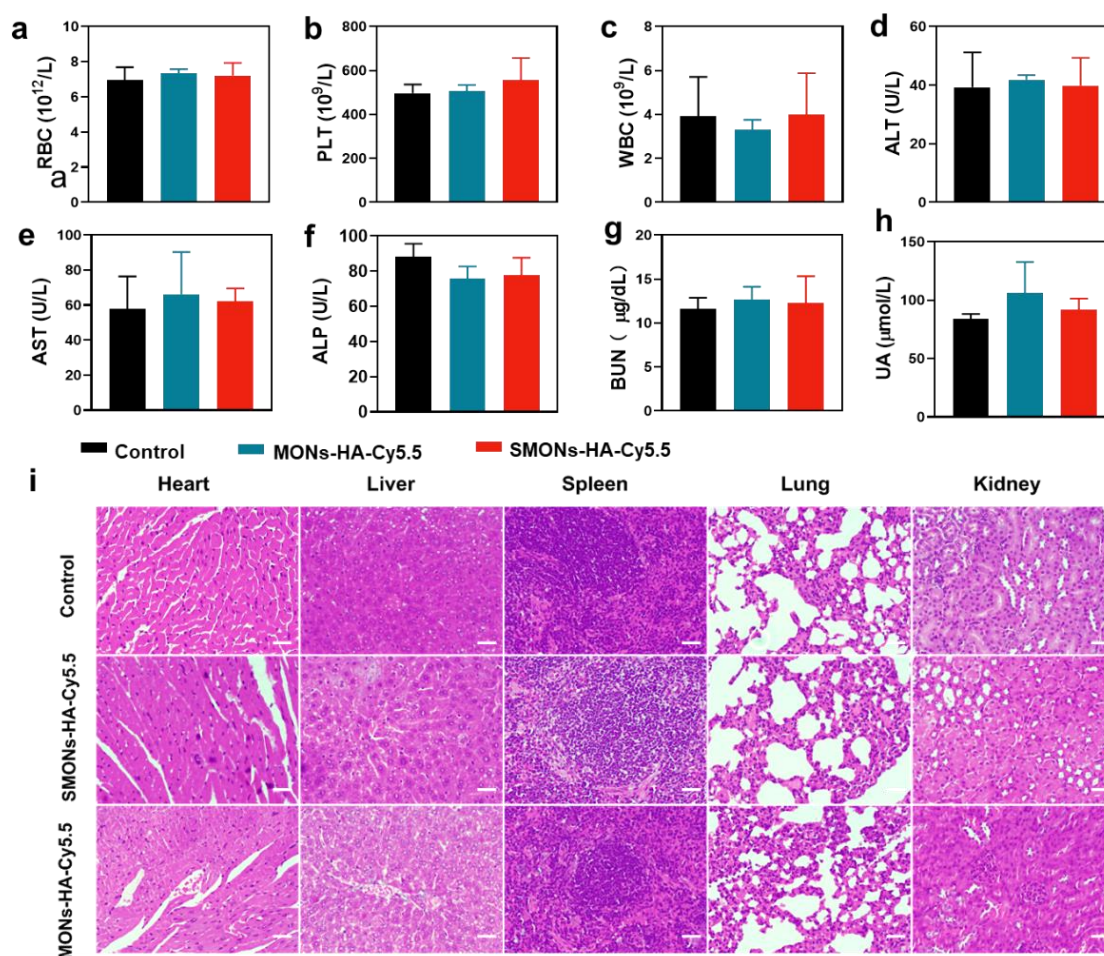

**Fig. S6** Biocompatibility of the MONs-HA-Cy5.5 and SMONs-HA-Cy5.5 (**a–h**) Blood routine and serum biochemical analysis. (**i**) H&E staining of the major organs of mice ( $n = 3$ ) intravenously injected with normal saline, MONs-HA-Cy5.5 and SMONs-HA-Cy5.5. Scale bars, 100  $\mu m$

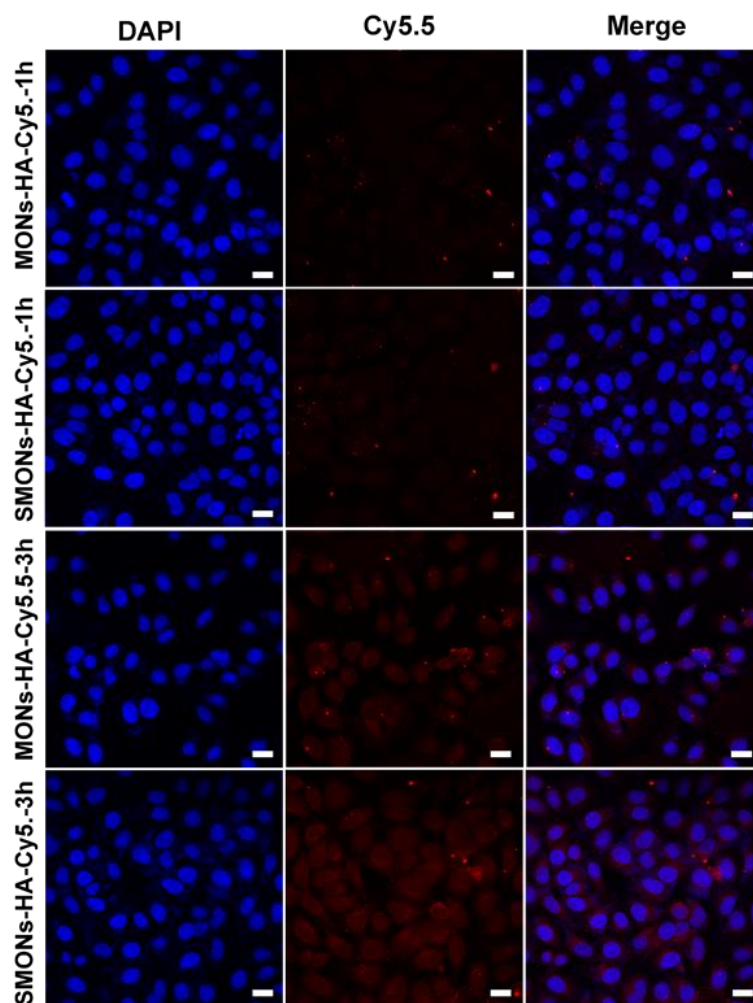

**Fig. S7** CLSM images of MCF-7 cells incubated with MONs-HA-Cy5.5 and SMONs-HA-Cy5.5 for 1 and 3 h. Scale bars, 25  $\mu\text{m}$

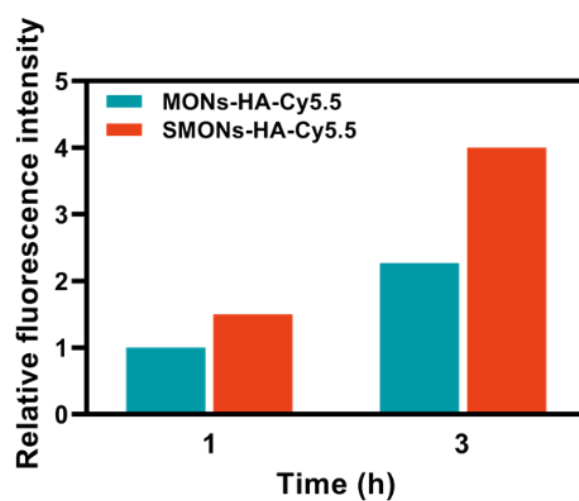

**Fig. S8** Relative fluorescence intensity analysis of MCF-7 cells incubated with the MONs-HA-Cy5.5 and SMONs-HA-Cy5.5 for 1 and 3 h

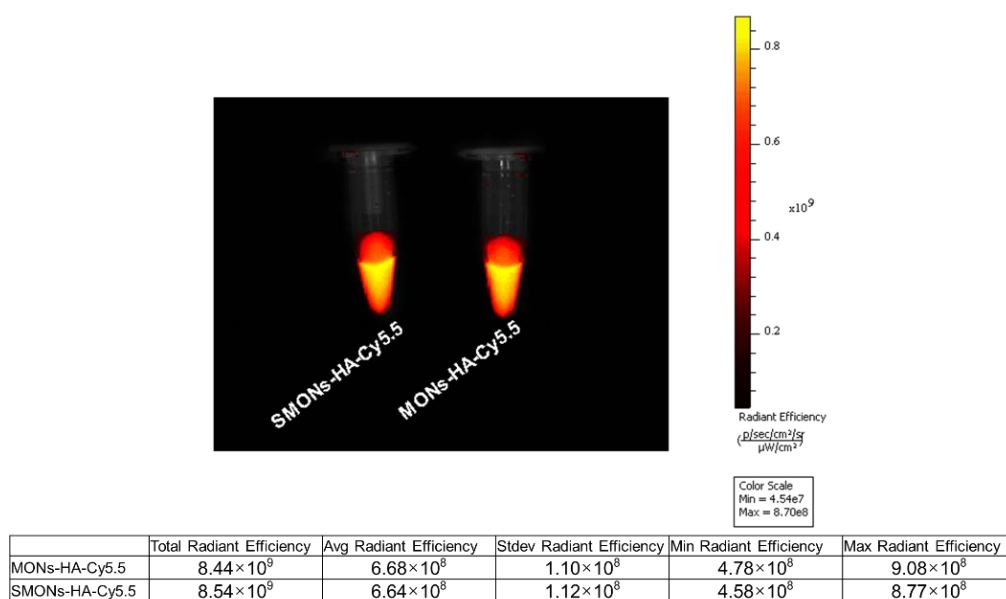

**Fig. S9** NIFR image and corresponding quantification of the fluorescence intensity of PBS solutions containing SMONs-HA-Cy5.5 or MONs-HA-Cy5.5

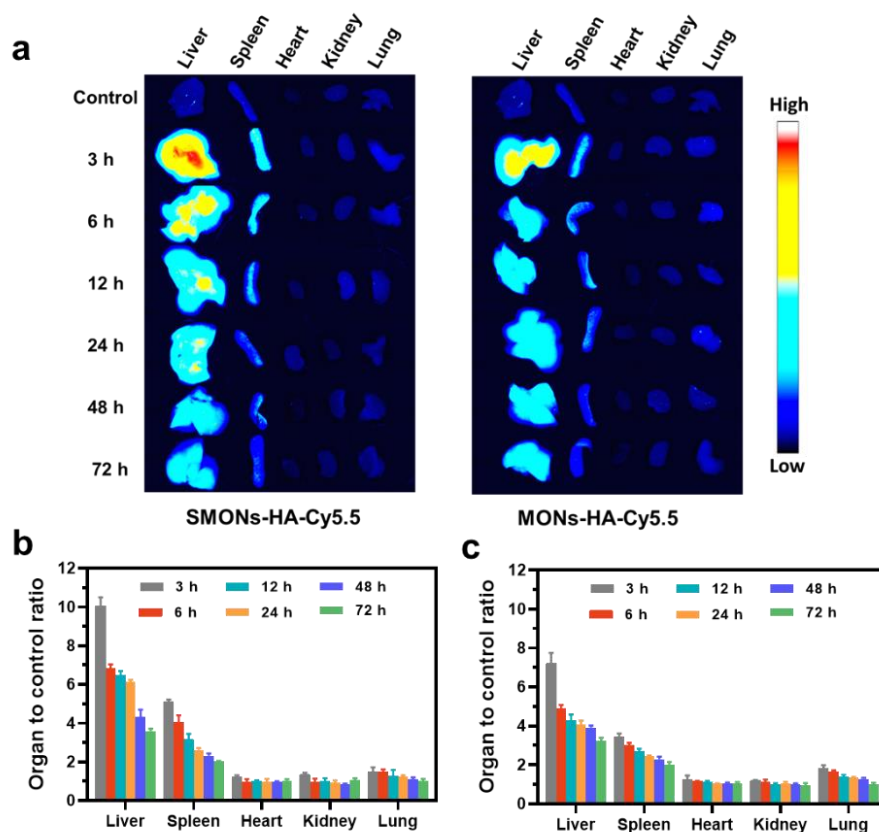

**Fig. S10 a** Ex vivo NIFR imaging and **b** quantification of the fluorescence intensity in each organ at different times after the administration of the SMONs-HA-Cy5.5 or MONs-HA-Cy5.5

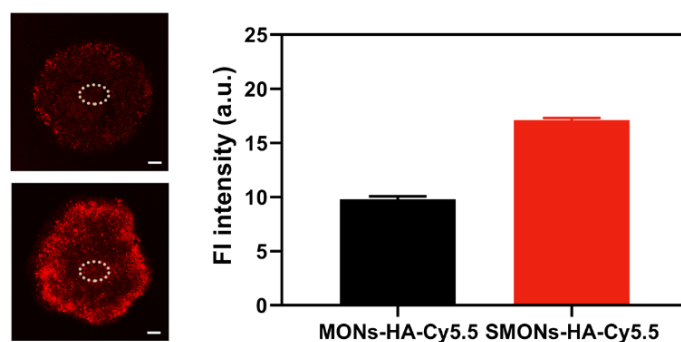

**Fig. S11** Fluorescence intensity of the MCSs central region at the Z-axis distance of 30  $\mu\text{m}$

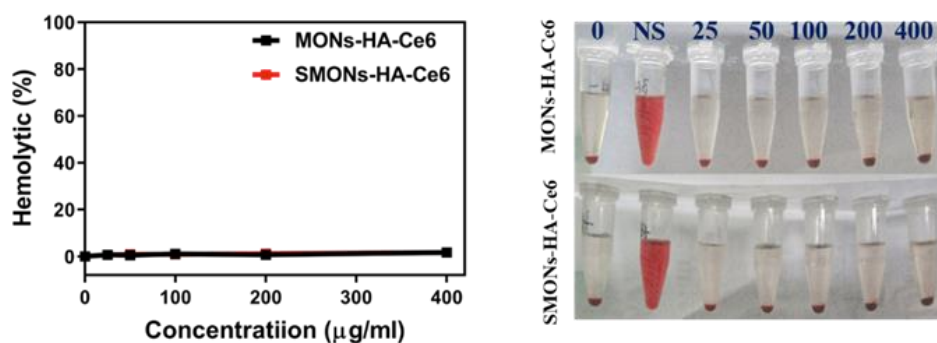

**Fig. S12** Fluorescence intensity of the MCSs central region at the Z-axis distance of 30  $\mu\text{m}$

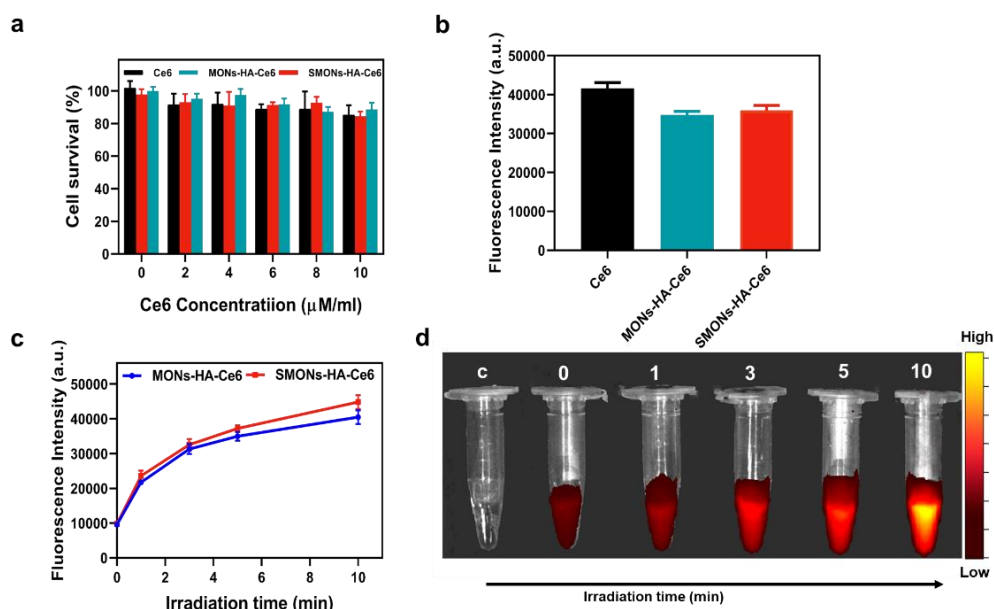

**Fig. S13** (a) Cytotoxicity of Ce6, MONs-HA-Ce6 and SMONs-HA-Ce6. (b-d) Detecting the generation of ROS. (b)  $^1\text{O}_2$  production of MONs-HA-Ce6 and SMONs-HA-Ce6 ( $4 \times 10^{-6}$  M Ce6 equiv.)  $\text{H}_2\text{O}_2$  (3 wt %) after irradiated (660 nm,  $0.5 \text{ W cm}^{-2}$ ) for 5 min. (c) SOSG fluorescence signal of MONs-HA-Ce6 and SMONs-HA-Ce6 under different time periods after irradiation. (d) Corresponding near-infrared fluorescence imaging of SMONs-HA-Ce6 after irradiation for different time
